# Supplementary material for: Influence of shell compositions of solution blown PVP/PCL core–shell fibers on drug release and cell growth
Source: RSC Adv. 2018 Sep 19;8(57):32470–80. doi: 10.1039/c8ra05485a (PMC9086270; doi:10.1039/c8ra05485a)
Supplement: RA-008-C8RA05485A-s001 [file RA-008-C8RA05485A-s001.pdf]

## Supporting Information

# Influence of Shell Compositions of Solution Blown PVP/PCL Core-Shell Fibers on Drug Release and Cell Growth

*Seok Chan Park<sup>†</sup>, Min Jung Kim<sup>†</sup>, Kyoungju Choi<sup>†‡</sup>, Jooyoun Kim<sup>\*§^</sup>, and Seong-O Choi<sup>\*†‡</sup>*

<sup>†</sup>Nanotechnology Innovation Center of Kansas State (NICKS), Kansas State University,  
Manhattan, KS, USA

<sup>‡</sup>Department of Anatomy and Physiology, College of Veterinary Medicine, Kansas State  
University, Manhattan, KS, USA

<sup>§</sup>Department of Textiles, Merchandising and Fashion Design, College of Human Ecology, Seoul  
National University, Seoul, Republic of Korea

<sup>^</sup>Research Institute of Human Ecology, Seoul National University, Seoul, Republic of Korea

\*E-mail: [jkim256@snu.ac.kr](mailto:jkim256@snu.ac.kr) (J. K.), \*E-mail: [sochoi@ksu.edu](mailto:sochoi@ksu.edu) (S.-O. C.).

SEM images of solution blown fibers with and without poly-L-lysine coating, and the EDS mapping results for CS-L and CS-H are shown along with the chemical structures of the polymers used for fiber fabrication.

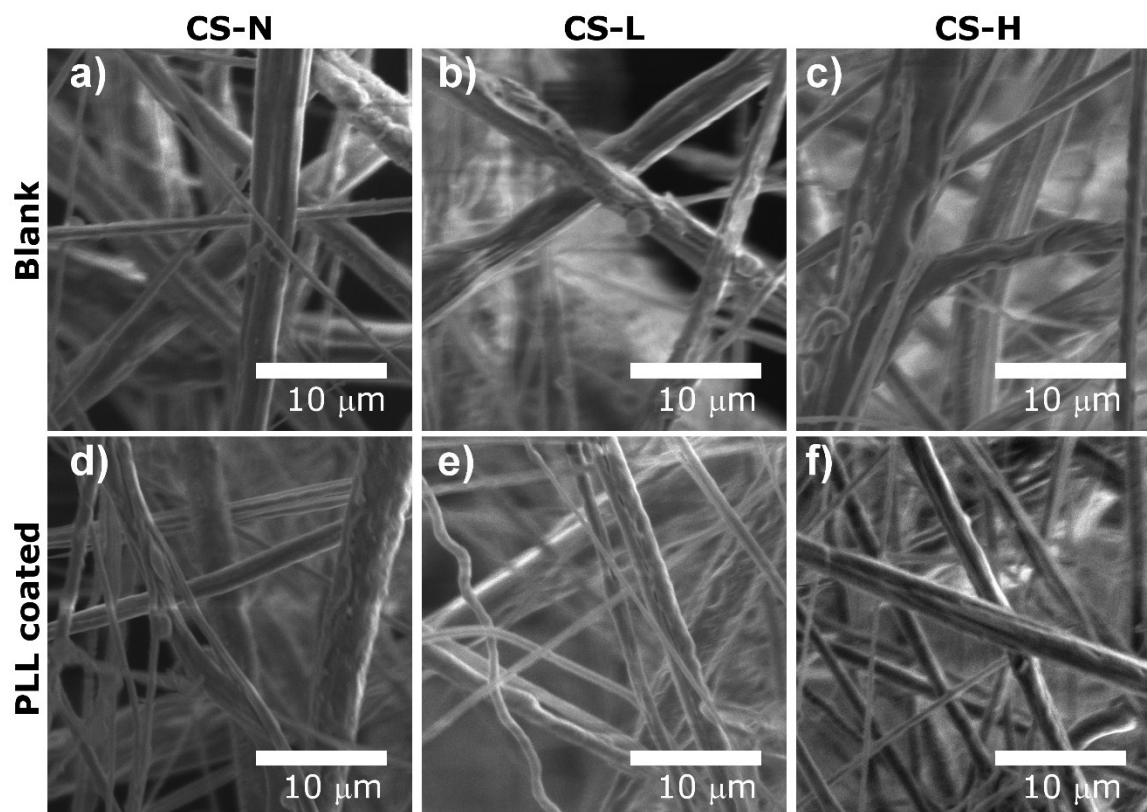

**Figure S1.** SEM images of solution blown fibers with (a, d) monolithic PCL shell (CS-N), (b, e) PCL shell containing 40 kDa PVP porogens (CS-L), and (c, f) PCL shell containing 1300 kDa PVP porogens (CS-H). The blank fibers (a, b, c) were immersed in DI water for 3 h, while (d, e, f) poly-L-lysine coated fibers were immersed in poly-L-lysine solution for 3 h.

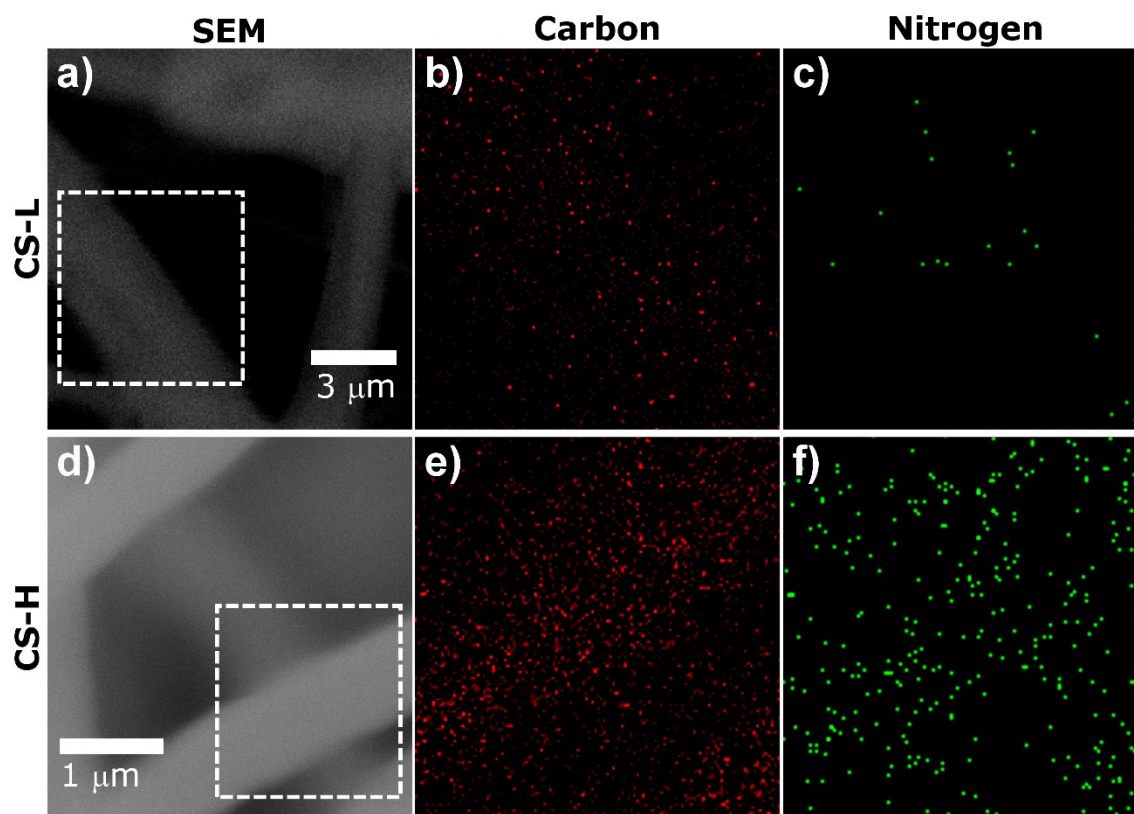

**Figure S2.** SEM images and elemental maps of core-shell fibers with (a, b, c) PCL shell containing 40 kDa PVP porogens (CS-L) and (d, e, f) PCL shell containing 1300 kDa PVP porogens (CS-H). Red spots in the elemental maps (b, e) represent the distribution of carbon, and green spots in the elemental maps (c, f) exhibit the nitrogen distribution on the fibers.

**a)**

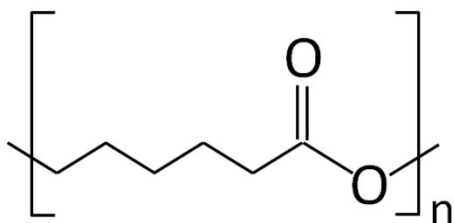

**b)**

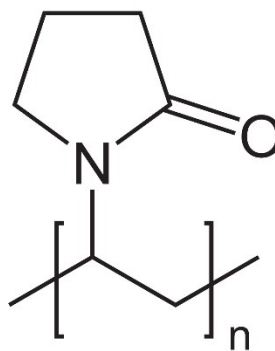

**Figure S3.** Chemical structure of (a) PCL and (b) PVP polymers used for fiber fabrication.
